# Supplementary material for: C. elegans patched-3 is an essential gene implicated in osmoregulation and requiring an intact permease transporter domain
Source: PubMed Central journal article supplement (PMC3078328; doi:10.1016/j.ydbio.2010.12.035), 2011-03-15
Supplement: mmc1.pdf [file mmc1.pdf]

TM6

---

SCAP\_*C.g.* VPAIQEFCLFAVVGLVSDFFLQMF~~F~~TTVLSIDIRRM  
 PTCH1\_*H.s.* IPALRAFSLQAAVVVVFNFAMVLLIFPAILSMDLYRR  
 PTCH1\_*M.m.* IPALRAFSLQAAVVVVFNFAMVLLIFPAILSMDLYRR  
 Ptc1\_*D.m.* VPALKVFCLOAAIVMCSNLAAALLVFPAMISLDLRRR  
 PTC-1\_*C.e.* IPALRSFCAQSSILLTFNFIAILTIYPAIISIDLRRK  
 PTC-3\_*C.e.* IPALRSFCSQTAILLAFNLIFLMFIFPAMIGIDLRRQ

Suppl. Fig. 1

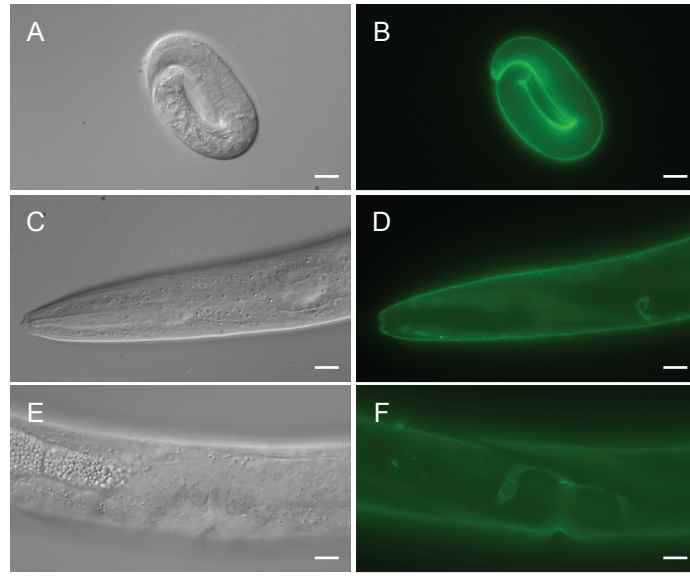

Suppl. Fig. 2

GxxxD/E TM4

```

Hs-PTCH1      NAATTQVL PFLALGVGVDDVFLLA
Ce-PTC-1      NAATTQIV PFLTLGI GVDNMFMLL
Ce-PTC-3      NAATTQVV PFLSLGLGIDDMFLLL
Ce-PTR-1      NAIVN-VS PFLILCI GIDDLFIMC
Ce-PTR-2      NDIVG-VMP FLVLA VGVDNMFLMV
Ce-PTR-3      GSILC-VTP FLVLA IGVDDSYLMA
Ce-PTR-4      NPVTS-TMP FLVLA VGDDDFLMM
Ce-PTR-5      NSFML-VMP FLVMGI GVDSCFLMI
Ce-PTR-6      AEITL-IAP FLVLSI GVDDMFIAV
Ce-PTR-7/DAF-6 NVINT-IIP FLIIAI GIDDMFLMN
Ce-PTR-8      SPIMC-ITP FLVLA ISVDDSFLLM
Ce-PTR-9      LPLVF-IMP FLVVSIG TDNMFLML
Ce-PTR-10     NDIIA-VMP FLVVA VGTDNMFLMV
Ce-PTR-11     FSIQC-VTP FLVVLGI GVDDAFILL
Ce-PTR-12     GSILC-VTP FLVLA IGVDDAYLMI
Ce-PTR-13     NSIMC-ITP FLLILGI GVDDAFLLL
Ce-PTR-14     GTILC-VTP FLILA IGVDDAYLQV
Ce-PTR-15     INQVT-VMP FLIALA IGVDDVYVML
Ce-PTR-16     NSITL-VMP FLIIGVGVDDVFI II
Ce-PTR-17     VDMCT-VMP FLSLTIG IDDTFLML
Ce-PTR-18     LPIVT-VVP FLILSIGVDDVFIFI
Ce-PTR-19     TSVAY-SMP FLIVFSVGV DNVFILL
Ce-PTR-20     SNILT-VVP FLVVTIG IDDAFLIL
Ce-PTR-21     NSPMM-IMP FLINGI GVNDAFLT L
Ce-PTR-22     QSIIV-STL FLVIAI GIDDIFIIL
Ce-PTR-23     ASILC-VIP FLVLSI GVDSSYLMI
Ce-PTR-24     TPLII-FTP FLALIHGY YTVIMLT
Ce-CHE-14     PLLNL-VTF VLIIAIGSD DAFLLK

```

GxxxD/E TM10

```

Hs-PTCH1      LSAVPVVIL IASVGI GIGVEFTVHVA
Ce-PTC-1      LNPVSAVTL ITAVGI GIGVEFTVHV V
Ce-PTC-3      NPISAVTLI CAVGI GIGVEFTA HVE
Ce-PTR-1      LDSVSIITV IMCI GF SVDLSAHIA
Ce-PTR-2      LDAISMITI IMSI GF SVDYSAHIA
Ce-PTR-3      LDPIMMSAT VM SIGF SVDIPSHVS
Ce-PTR-4      LDSVSMGCIV MAI GLAVDYSV HIC
Ce-PTR-5      LDPVVMAAVL MSIGL SVDFIAHVA
Ce-PTR-6      LDPISMITI IMSI GFS EFSAHIT
Ce-PTR-7/DAF-6 LDAVSMISI IMSI GF AVDLSAHII
Ce-PTR-8      LDPVIMSIAI MCIGF SVDIPAHVA
Ce-PTR-9      LDII SMITIVMSV GF SVDYVTHTT
Ce-PTR-10     LDAISMITI IMSV GF SVDYSAHIT
Ce-PTR-11     LDPVIQVDV LLATGF SVDYTAHVA
Ce-PTR-12     LDPIVMSALI ISI GF SVDIPAHIS
Ce-PTR-13     LDPVTMIDV IMAI GF SVDYSAHVC
Ce-PTR-14     LDPISMACLI MSI GF SVD FPAHIT
Ce-PTR-15     LDPMTVVN ILMSIG QC DFATHVG
Ce-PTR-16     LDPITMCTTL MSI GF SVDFTA HIS
Ce-PTR-17     LDATSMITV AMSV GF SVDFAAHVS
Ce-PTR-18     LDPISM TLLMAI GF SVD FVAHIT
Ce-PTR-19     LDFISMVTI VMSI GF CVDFAAHLA
Ce-PTR-20     LDAVSLISML MSI GF SVDYSAHVC
Ce-PTR-21     LDPVTLCAV I VSI GMSVD FVAHVA
Ce-PTR-22     M PVSTASLL MSI GF SVDISAHIS
Ce-PTR-23     LDPITMAAMI ISI GF SVDIPAHVS
Ce-PTR-24     INPFNA AFFLIIAALA SCTTHYC
Ce-CHE-14     LGVLEAVIL VLVVGLSFDY TLHYG

```

Suppl. Fig. 3

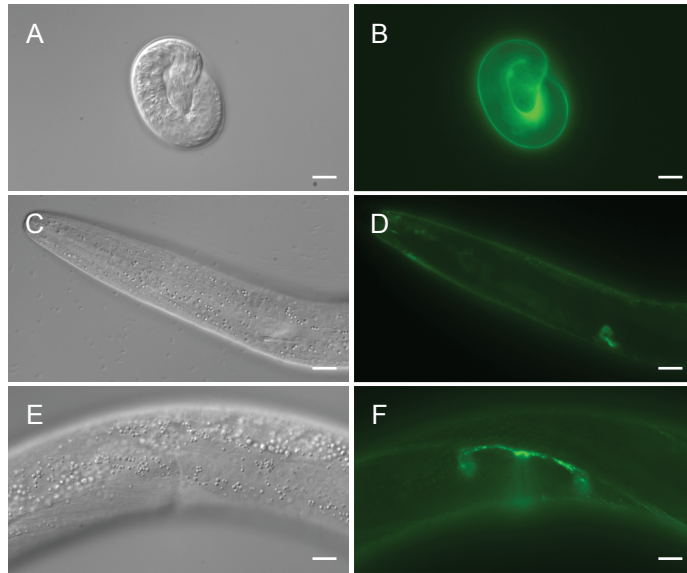

Suppl. Fig. 4
